# Supplementary material
Source: PubMed Central journal article supplement (PMC3607042)
Supplement: 1215177110_pnas.201215177SI.pdf [file 1215177110_pnas.201215177SI.pdf]

# Supporting Information

Franco et al. 10.1073/pnas.1215177110

## SI Materials and Methods

**Heat shock protein 90 was purified from rat liver.** Two hundred grams of rat liver were dissected and homogenized using an Elvehjem-Potter in homogenization buffer (50 mM Tris, 0.25 M sucrose, 25 mM KCl, 5 mM MgCl<sub>2</sub>, 3.3 mM CaCl<sub>2</sub>, 0.5 mM PMSF, pH 7.4). The homogenate was centrifuged for 15 min at 1,500 × g at 4 °C. The supernatant was spun for 1 h at 10,000 × g at 4 °C. Floating fat was removed carefully, and the clear cytosol was dialyzed against dialysis buffer (50 mM Tris, 2.5 mM MgCl<sub>2</sub>, 2.5 mM KH<sub>2</sub>PO<sub>4</sub>, 25 mM KCl, 2 mM DTT, 0.5 mM PMSF, pH 7.4). After dialysis, the cytosol was centrifuged at 95,000 × g at 4 °C for 14 h. Floating fat was removed carefully. The supernatant was collected and filtered with a 0.45-μm filter. The cytosolic fraction was loaded on an ion exchange column (Q Sepharose Fast Flow Amersham Biosciences 17-0510-01, XK16/40) linked to a BioLogic LP Chromatography system (Bio-Rad). The ion exchange column was equilibrated with buffer A (25 mM Tris, 1.25 mM MgCl<sub>2</sub>, 1.25 mM KH<sub>2</sub>PO<sub>4</sub>, 12.5 mM KCl, pH 7.4). After the column was washed with 75% buffer A and 25% buffer B (25 mM Tris, 1.25 mM MgCl<sub>2</sub>, 1.25 mM KH<sub>2</sub>PO<sub>4</sub>, 12.5 mM

KCl, 1 M NaCl, pH 7.4), the absorbed proteins were eluted with a linear gradient of 25–100% buffer B. Fractions were collected and analyzed by SDS/PAGE. Fractions containing the highest heat-shock protein 90 (Hsp90) concentration were pooled and dialyzed against 10 mM dialysis buffer (pH 6.8). The pooled Hsp90 fractions were loaded on a hydroxyapatite column (Bio-Rad) equilibrated with 10 mM KH<sub>2</sub>PO<sub>4</sub> (pH 6.8). After washing with 10 mM KH<sub>2</sub>PO<sub>4</sub> (pH 6.8), proteins were eluted with a linear gradient of 10–400 mM KH<sub>2</sub>PO<sub>4</sub> (pH 6.8) buffer. Fractions were collected and analyzed by SDS/PAGE. Fractions containing the highest Hsp90 concentration were pooled. The pooled fractions were dialyzed against 50 mM Tris, 2.5 mM MgCl<sub>2</sub>, 2.5 mM KH<sub>2</sub>PO<sub>4</sub>, 25 mM KCl, 2 mM DTT, 0.5 mM PMSF, pH 7.4. The protein concentrations were adjusted to 5 mg/mL using Centricon Plus-20 (Millipore). Hsp90 was purified further by gel filtration using a Superdex 200 HiLoad16/60 column (Amersham Biosciences). The column was equilibrated with 50 mM Tris, 2.5 mM MgCl<sub>2</sub>, 150 mM KCl, KH<sub>2</sub>PO<sub>4</sub>, pH 7.4. Fractions were collected and analyzed with SDS/PAGE.

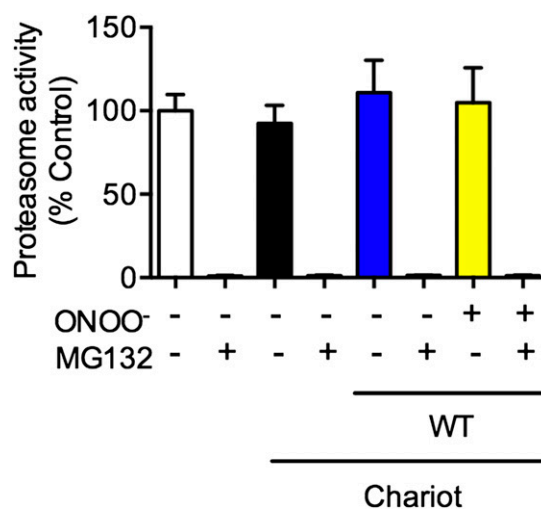

**Fig. S1.** Peroxynitrite-treated Hsp90 does not affect the proteasome activity in PC12 cells. The chymotrypsin-like activity of the proteasome was determined by a luminescent cell-based assay after the delivery of Hsp90 (WT) or peroxynitrite-treated Hsp90 (WT+ONOO<sup>-</sup>). The proteasome inhibitor MG132 (1 μM) was used to verify the specificity of the assay.

**A**

```

yeast Hsp82 -----MASETFEFOAEITQLMSLIINTVY*SNKEIFLRELISNASDALKIRY*ESLTDPSKLDGSEPD
rat Hsp90α  MPEETQDDQPMEEVEVTFQAEIAQLMSLIINTVY*SNKEIFLRELISNSDALKIRY*ESLTDPSKLDGSEK
human Hsp90α MPEETQDDQPMEEVEVTFQAEIAQLMSLIINTVY*SNKEIFLRELISNSDALKIRY*ESLTDPSKLDGSEK
rat Hsp90β  MPEEVH-----GEEVEVTFQAEIAQLMSLIINTVY*SNKEIFLRELISNASDALKIRY*ESLTDPSKLDGSEK
human Hsp90β MPEEVH-----GEEVEVTFQAEIAQLMSLIINTVY*SNKEIFLRELISNASDALKIRY*ESLTDPSKLDGSEK

LFIRITPKPEQKLEIRDSIGMTKAEILNNLGTIAKSGTKAFMEALAGADVSMIGQGVGFYSLFVADRQVQ
LHNLIPNKQDRLTLVDTGIGMTKADLNNLGTIAKSGTKAFMEALAGADISMGQGVGFYSAVLVARKVTV
LHNLIPNKQDRLTLVDTGIGMTKADLNNLGTIAKSGTKAFMEALAGADISMGQGVGFYSAVLVARKVTV
LKIDIIPNQRITLTVDTGIGMTKADLNNLGTIAKSGTKAFMEALAGADISMGQGVGFYSAVLVARKVTV
LKIDIIPNQRITLTVDTGIGMTKADLNNLGTIAKSGTKAFMEALAGADISMGQGVGFYSAVLVARKVTV

ISKNDDEQYIWSNAGGSGFTVLDVNERIGRGTILRLFLKDDQLEYLEEKRIKEVIRKHSSEFVAYPIQLVVK
ITKNDDEQYIWSNAGGSGFTVLDVNERIGRGTILRLFLKDDQLEYLEEKRIKEVIRKHSSEFVAYPIQLVVK
ITKNDDEQYIWSNAGGSGFTVLDVNERIGRGTILRLFLKDDQLEYLEEKRIKEVIRKHSSEFVAYPIQLVVK
ITKNDDEQYIWSNAGGSGFTVLDVNERIGRGTILRLFLKDDQLEYLEEKRIKEVIRKHSSEFVAYPIQLVVK
ITKNDDEQYIWSNAGGSGFTVLDVNERIGRGTILRLFLKDDQLEYLEEKRIKEVIRKHSSEFVAYPIQLVVK
ITKNDDEQYIWSNAGGSGFTVLDVNERIGRGTILRLFLKDDQLEYLEEKRIKEVIRKHSSEFVAYPIQLVVK

FVEKEVPIPEEKKDEEKKDEEKKDEE-DKKPKLEEVDEEE-----KKPKTKVKEEVEEIQEELNKTPIWT
ERKVESDDEAEKEEKEEKEEKEEEDDDKPEIEDVGSDEE-EKKDGGKDKKIKKIKYDQELNKTPIWT
ERKVESDDEAEKEEKEEKEEKEEEDDDKPEIEDVGSDEE-EKKDGGKDKKIKKIKYDQELNKTPIWT
EREKESDDEAEKEEKEEKEEKEEEDDDKPEIEDVGSDEE-EKKDGGKDKKIKKIKYDQELNKTPIWT
EREKESDDEAEKEEKEEKEEKEEEDDDKPEIEDVGSDEE-EKKDGGKDKKIKKIKYDQELNKTPIWT

RNPDSITQEEYNAFYKISNDWEDPLVVKHFSVEGQLEFRALLFIPRAPPDFLFENKKNKIKLYVRVFTDDE
RNPDDITNEEYGEFYKSLNDWEDHLAVKHFSEVQGLEFRALLFVPRAPPDFLFENKKNKIKLYVRVFTDDE
RNPDDITNEEYGEFYKSLNDWEDHLAVKHFSEVQGLEFRALLFVPRAPPDFLFENKKNKIKLYVRVFTDDE
RNPDDITNEEYGEFYKSLNDWEDHLAVKHFSEVQGLEFRALLFVPRAPPDFLFENKKNKIKLYVRVFTDDE
RNPDDITNEEYGEFYKSLNDWEDHLAVKHFSEVQGLEFRALLFVPRAPPDFLFENKKNKIKLYVRVFTDDE
RNPDDITNEEYGEFYKSLNDWEDHLAVKHFSEVQGLEFRALLFVPRAPPDFLFENKKNKIKLYVRVFTDDE

AEDLIPEWLSFKGVVDSDELPLNLSREMLQNKIMKIRKNIKVKLEAFNAEIDSEQEFKFSYAFSKNIKLG
CEELIPEYLNFRIGVDSDELPLNLSREMLQNKILKIRKNIKVKLELFEALADENKFKYFQFSKNIKLG
CEELIPEYLNFRIGVDSDELPLNLSREMLQNKILKIRKNIKVKLELFEALADENKFKYFQFSKNIKLG
CEELIPEYLNFRIGVDSDELPLNLSREMLQNKILKIRKNIKVKLELFEALADENKFKYFQFSKNIKLG
CEELIPEYLNFRIGVDSDELPLNLSREMLQNKILKIRKNIKVKLELFEALADENKFKYFQFSKNIKLG

VHEDTNRALAKLLRYNSTRKSVDELSTLDTYVTRMPEHQNIYITGESLKAVERKSPFLDALKAKNFVFLFD
IHEDSNRKLSELLRYNSTRKSVDELSTLDTYVTRMPEHQNIYITGESLKAVERKSPFLDALKAKNFVFLFD
IHEDSNRKLSELLRYNSTRKSVDELSTLDTYVTRMPEHQNIYITGESLKAVERKSPFLDALKAKNFVFLFD
IHEDSNRKLSELLRYNSTRKSVDELSTLDTYVTRMPEHQNIYITGESLKAVERKSPFLDALKAKNFVFLFD
IHEDSNRKLSELLRYNSTRKSVDELSTLDTYVTRMPEHQNIYITGESLKAVERKSPFLDALKAKNFVFLFD
IHEDSNRKLSELLRYNSTRKSVDELSTLDTYVTRMPEHQNIYITGESLKAVERKSPFLDALKAKNFVFLFD

PIDEYATQLKEFGKTLVDITKD-FLEETDEEKAEREKEIKEYEPIITKALKEILDQGVQVYVSKLIDAPAA
PIDEYCVQQLKEFGKTLVSVTKEGLEPEDEEKKKQEKKTKFENLCKIMDKLEKKVYVSKLIDAPAA
PIDEYCVQQLKEFGKTLVSVTKEGLEPEDEEKKKQEKKTKFENLCKIMDKLEKKVYVSKLIDAPAA
PIDEYCVQQLKEFGKTLVSVTKEGLEPEDEEKKKQEKKTKFENLCKIMDKLEKKVYVSKLIDAPAA
PIDEYCVQQLKEFGKTLVSVTKEGLEPEDEEKKKQEKKTKFENLCKIMDKLEKKVYVSKLIDAPAA
PIDEYCVQQLKEFGKTLVSVTKEGLEPEDEEKKKQEKKTKFENLCKIMDKLEKKVYVSKLIDAPAA

IRTPQGWANMERIMKAQALRDSMSYMSKKTFFIIPKSPFIKELKRVDEGGAQDKTKVLDLKLLETALL
IVTSTYGTANMERIMKAQALRDSMSYMSKKTFFIIPKSPFIKELKRVDEGGAQDKTKVLDLKLLETALL
IVTSTYGTANMERIMKAQALRDSMSYMSKKTFFIIPKSPFIKELKRVDEGGAQDKTKVLDLKLLETALL
IVTSTYGTANMERIMKAQALRDSMSYMSKKTFFIIPKSPFIKELKRVDEGGAQDKTKVLDLKLLETALL
IVTSTYGTANMERIMKAQALRDSMSYMSKKTFFIIPKSPFIKELKRVDEGGAQDKTKVLDLKLLETALL
IVTSTYGTANMERIMKAQALRDSMSYMSKKTFFIIPKSPFIKELKRVDEGGAQDKTKVLDLKLLETALL

TSGFSLDEPTSFASRINRLISLGLNIDEDEETETAPEASTA---APVEEVPADTEMEEVD
SGFSLDEPTQTHANRYRMIKGLGIDEDDPTVDDTSAVTEEMPLEGGDDTSRMEEVD
SGFSLDEPTQTHANRYRMIKGLGIDEDDPTVDDTSAVTEEMPLEGGDDTSRMEEVD
SGFSLDEPTQTHANRYRMIKGLGIDEDDPTVDDTSAVTEEMPLEGGDDTSRMEEVD
SGFSLDEPTQTHANRYRMIKGLGIDEDDPTVDDTSAVTEEMPLEGGDDTSRMEEVD
SGFSLDEPTQTHANRYRMIKGLGIDEDDPTVDDTSAVTEEMPLEGGDDTSRMEEVD

```

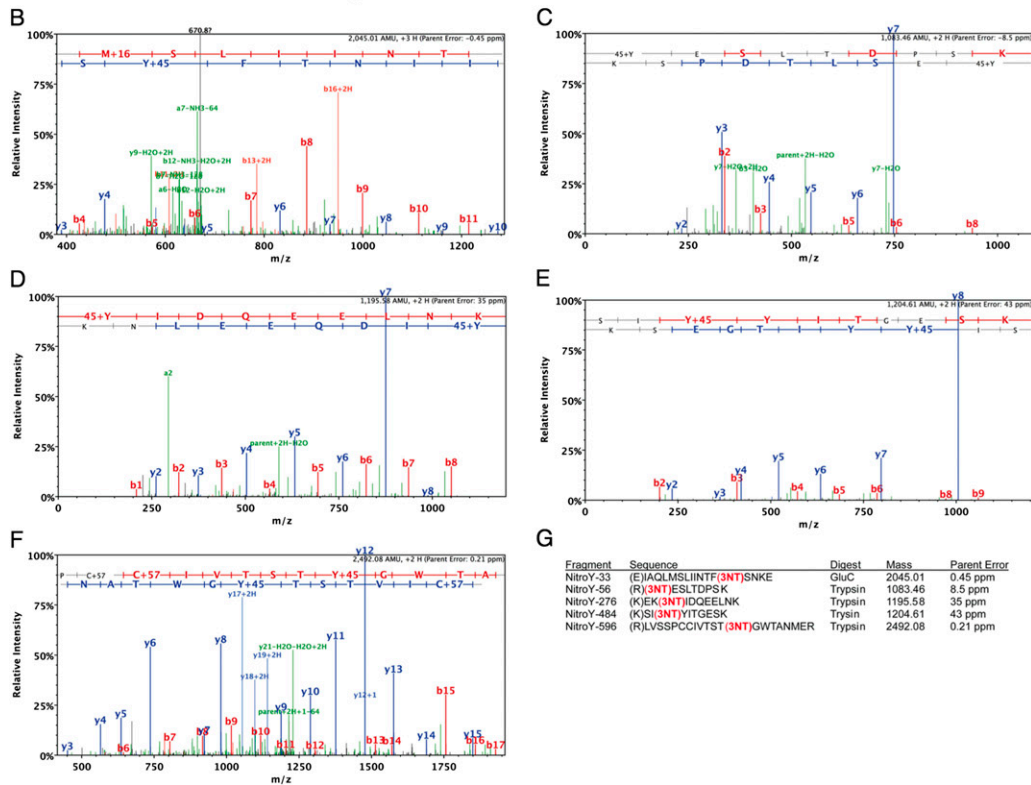

**Fig. 52.** Amino acid sequence alignment of yeast 82-kDa heat-shock protein (Hsp82) and rat and human Hsp90 $\alpha$  and  $\beta$  and confirmation of the site-specific incorporation of nitrotyrosine residues into human Hsp90 $\beta$ . (A) The amino acid sequences corresponding to yeast Hsp82 and rat and human Hsp90 $\alpha$  and  $\beta$  were aligned using the Multiple Sequence Alignment (MSA) tool from the Expert Protein Analysis System (Expasy) Proteomics Server. The asterisks denote the position of the five tyrosine residues prone to nitration (in red). Of note are the regions with a high degree of homology surrounding the tyrosine residues of interest and the high degree of homology between the human and rat Hsp90 sequences. (B–F) To confirm the site-specific incorporation of nitrotyrosine into recombinant human Hsp90 $\beta$ , in-gel digests were performed on pure proteins with trypsin or gluc, and the resulting fragments were analyzed by tandem mass spectrometry (MS/MS) fragmentation in two independent facilities. Shown are spectra of the sequence-specific MS/MS fragmentation of each peptide containing nitrotyrosine for each of the genetically nitrated Hsp90 proteins. A through E show spectra of relevant peptides from digests of nitrotyrosine at sites 33, 56, 276, 484, and 596, respectively. (G) Table showing the digest method and expected fragments detected for A–E with the altered site labeled as 3NT (in red). These spectra confirm 3-nitrotyrosine incorporation at the expected positions.

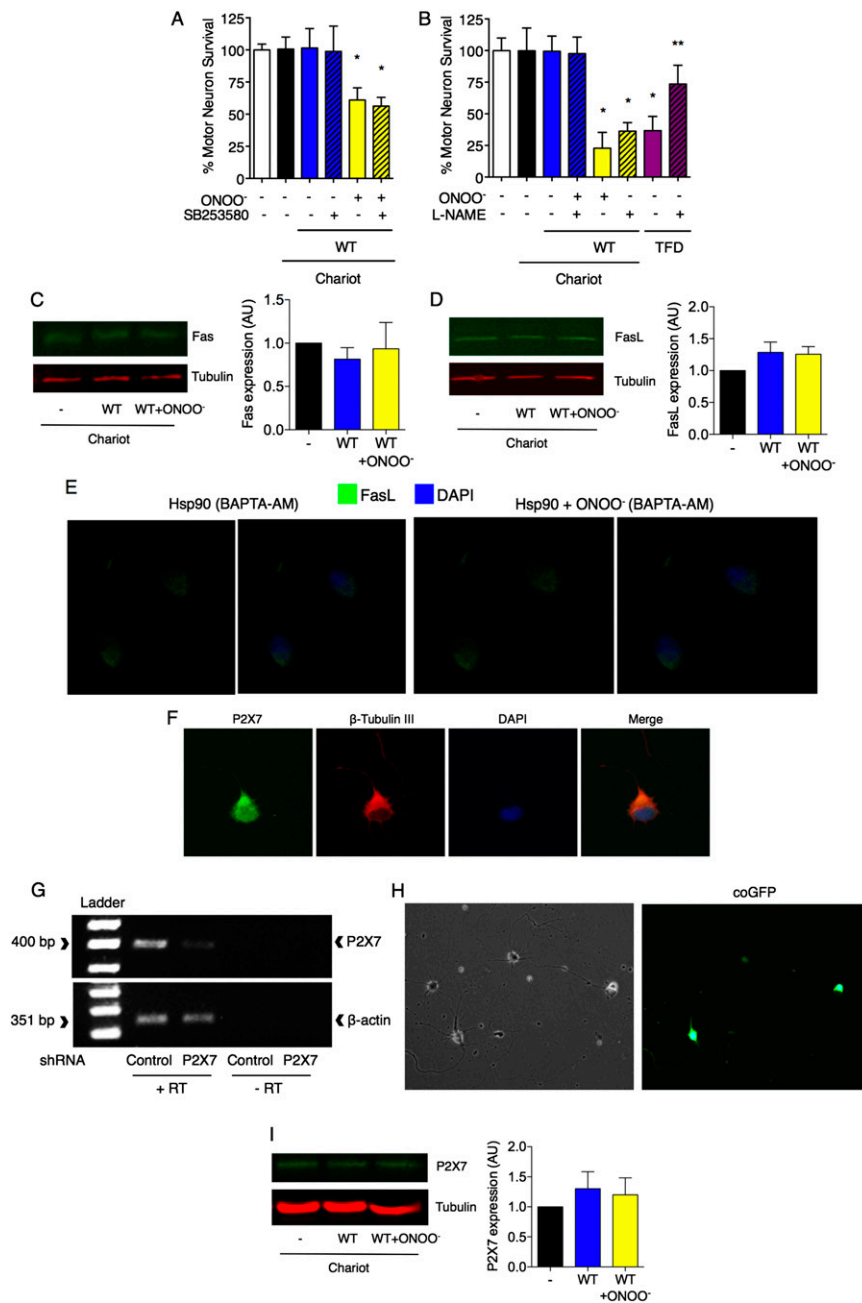

**Fig. S3.** Peroxynitrite-treated Hsp90 does not activate the DAXX component of the Fas pathway or alter the expression of FasL and P2X7 in motor neurons but does induce the mobilization of FasL to the plasma membrane. (A and B) The p38 inhibitor SB253580 (1  $\mu$ M) (A), and the NOS inhibitor L-NG-nitroarginine methyl ester (L-NAME) (100  $\mu$ M) (B) did not protect motor neurons from nitrated Hsp90-induced cell death. The motor neurons were incubated with SB253580 and L-NAME for 24 h after intracellular delivery of peroxynitrite-treated Hsp90. \* $P < 0.05$  versus WT, \*\* $P < 0.05$  versus WT + ONOO<sup>-</sup> by ANOVA followed by Bonferroni multiple comparison test. (C and D) WT Hsp90 and peroxynitrite-treated Hsp90 (WT+ONOO<sup>-</sup>) do not alter the expression of Fas receptor (C) or FasL (D) in motor neurons, as determined by Western blot with infrared detection. The graphs on the right of the panels show the ratio between the Fas receptor or FasL and tubulin signals ( $n = 3$ ) with respect to the control incubated with Chariot alone (-). (E) Calcium chelation decreased the mobilization of FasL to the plasma membrane upon the intracellular delivery of peroxynitrite-treated Hsp90. The motor neurons were incubated for 16 h in the presence of 5  $\mu$ M BAPTA-AM after the intracellular delivery of unmodified (Hsp90) or peroxynitrite-treated Hsp90 (Hsp90 + ONOO<sup>-</sup>). The cells then were stained for FasL (green). (F) P2X7 (in green) is expressed in motor neurons. The cytoskeleton was stained for  $\beta$ -tubulin III (red); DAPI corresponds to the nuclear staining (blue). "Merge" shows the superposition of the signals. (G) RT-PCR showing the P2X7 receptor knockdown in motor neurons upon transduction with lentiviral particles expressing P2X7 shRNA. Expression of a scrambled shRNA sequence was used as a control (control shRNA). The motor neurons were incubated further for 84 h after the addition of the lentiviral particles. +RT and -RT indicate that the samples were incubated in the presence or absence of retrotranscriptase, respectively. (H) The transduction efficiency was 90–95%, as shown 84 h after transduction of motor neurons with lentiviral particles expressing coGFP. (I) WT Hsp90 and peroxynitrite-treated Hsp90 (WT+ONOO<sup>-</sup>) do not alter the expression of P2X7 receptor in motor neurons, as determined by Western blot with infrared detection. The graph on the right shows the ratio between the P2X7 and tubulin signals ( $n = 3$ ) with respect to the control (-).

A

| Peptides                         | Code | Position    |
|----------------------------------|------|-------------|
| SLIINTF <sup>Y</sup> SNKEIFLREL  | 1A   | Tyr33       |
| SLIINTF <sup>nY</sup> SNKEIFLREL | 1B   | NitroTyr33  |
| SDALDKIR <sup>Y</sup> ESLTDPSK   | 2A   | Tyr56       |
| SDALDKIR <sup>nY</sup> ESLTDPSK  | 2B   | NitroTyr56  |
| TKKIKEK <sup>Y</sup> IDQEELNKTG  | 3A   | Tyr276      |
| TKKIKEK <sup>nY</sup> IDQEELNKTG | 3B   | NitroTyr276 |
| KETQKSI <sup>Y</sup> YITGESKEQ   | 4A   | Tyr484      |
| KETQKSI <sup>nY</sup> YITGESKEQ  | 4B   | NitroTyr484 |
| IVTST <sup>Y</sup> GWTANMERI     | 5A   | Tyr596      |
| IVTST <sup>nY</sup> GWTANMERI    | 5B   | NitroTyr596 |

B

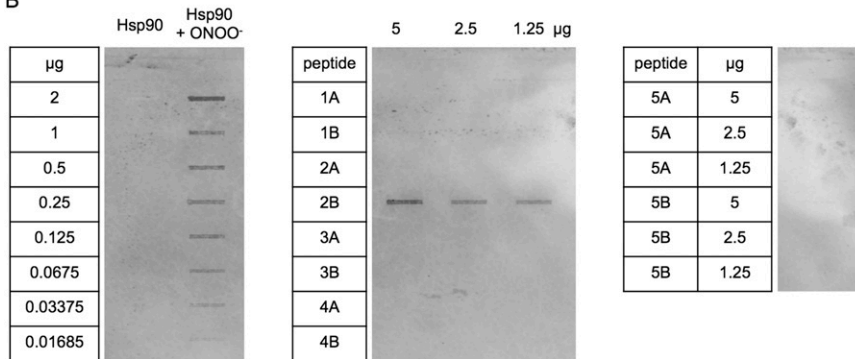

C

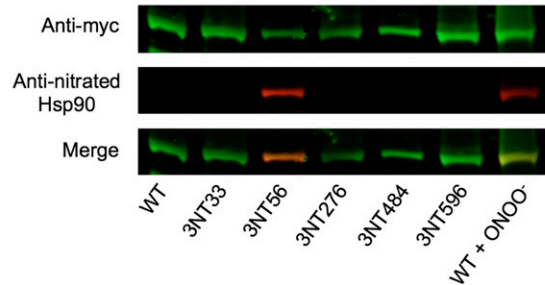

**Fig. S4.** Characterization of the intramolecular specificity of the antibody raised against nitrated Hsp90. The antibody specifically recognizes Hsp90 when nitrated at position 56. (A) Sequences of peptides synthesized with the human Hsp90 $\beta$  isomer for each nitration site in Hsp90 with tyrosine (Y, in red) or nitrotyrosine (nY, in red). The sequence of the peptides was corroborated by mass spectrometry. (B) The peptides were transferred to a membrane using a Slot blot device (Bio-Rad) as identified by the legend on the left, and were incubated with a monoclonal antibody (1:2,000 dilution) raised to recognize nitrated Hsp90. The primary antibody then was visualized using the Odyssey system (Licor) after incubation with a corresponding infrared fluorescent secondary antibody. The antibody recognized only peroxyxynitrite-treated Hsp90 and the peptide 2B corresponding to tyrosine 56 in Hsp90 $\beta$ . (C) The specificity of the antibody was corroborated by Western blot. The myc-tagged recombinant Hsp90 $\beta$  treated or not treated with peroxyxynitrite (WT + ONOO<sup>-</sup> and WT, respectively) and the five modified proteins containing a single nitrotyrosine in the positions prone to nitration (3NT) were loaded into a SDS/PAGE. A polyclonal antibody for the myc tag was used to detect total Hsp90 $\beta$ , and the monoclonal antibody was used to detect nitrated Hsp90. "Merge" shows the superposition of both signals. These results show that the antibody against nitrated Hsp90 and used for immunohistochemistry in Fig. 4 recognized only Hsp90 with nitrotyrosine in position 56.

**Table S1. Putative nitrated proteins in PC12 cells after treatment with peroxyxynitrite**

| Protein                                | Score | Matched peptides |
|----------------------------------------|-------|------------------|
| $\beta$ -Tubulin                       | 103   | 8                |
| $\beta$ -Actin                         | 123   | 7                |
| Elongation factor 1 $\alpha$ -5        | 122   | 8                |
| Hsp90                                  | 131   | 9                |
| Hsp70                                  | 99    | 7                |
| Lamin A                                | 138   | 10               |
| DnaK-mitochondrial molecular chaperone | 79    | 5                |
| Mortalin mot-2                         | 79    | 6                |
| Myosin Ic                              | 96    | 8                |
| Malate synthase                        | 66    | 5                |
| Histone H1.1                           | 96    | 8                |
| MHC class I antigen                    | 54    | 7                |
| Fructose-biphosphate aldolase          | 66    | 7                |
| Growth inhibitor gene                  | 68    | 6                |
| RNA polymerase subunit P3              | 59    | 6                |
| Quinolate synthase                     | 55    | 7                |
| Amidohydrolase                         | 54    | 6                |

The nitrated proteins were identified by MALDI-TOF mass spectrometry analysis. At least one of the matched peptides was sequenced for each protein.
